# Supplementary material
Source: PubMed Central journal article supplement (PMC6990413)
Supplement: NIHMS1540245-supplement-Supp1.pdf [file NIHMS1540245-supplement-Supp1.pdf]

## Supplemental

Sup Table 1: Internal standard concentrations in mixture

| Internal Standard                                    | Mass Fraction (ng/g) | Mass amended into sample (ng) |
|------------------------------------------------------|----------------------|-------------------------------|
| 17-Hydroxyprogesterone- <sup>13</sup> C <sub>3</sub> | 232                  | 18.3                          |
| Androstenedione- <sup>13</sup> C <sub>3</sub>        | 247                  | 19.6                          |
| Cortisol- <i>d</i> <sub>4</sub>                      | 236                  | 18.7                          |
| Progesterone- <sup>13</sup> C <sub>3</sub>           | 239                  | 19.0                          |
| Testosterone- <sup>13</sup> C <sub>3</sub>           | 245                  | 19.4                          |

Sup Table 2: Calibration curve range and information

| Analyte                           | Internal Standard                                    | Determination Coefficient (r <sup>2</sup> ) | Cal Range (ng per vial) |
|-----------------------------------|------------------------------------------------------|---------------------------------------------|-------------------------|
| 11-Deoxycorticosterone            | Cortisol- <i>d</i> <sub>4</sub>                      | 0.970                                       | 0.187 - 1.65            |
| 11-Deoxycorticosterone - SRM 1945 | Cortisol- <i>d</i> <sub>4</sub>                      | 1.00                                        | 0.849 - 20.4            |
| 11-Deoxycortisol                  | Cortisol- <i>d</i> <sub>4</sub>                      | 1.00                                        | 0.127 - 2.21            |
| 11-Deoxycortisol- SRM 1945        | Cortisol- <i>d</i> <sub>4</sub>                      | 1.00                                        | 1.13 - 27.3             |
| 17-Hydroxyprogesterone            | 17-Hydroxyprogesterone- <sup>13</sup> C <sub>3</sub> | 0.982                                       | 0.577 - 5.47            |
| Androstenedione                   | Androstenedione- <sup>13</sup> C <sub>3</sub>        | 1.00                                        | 0.106 - 4.88            |
| Corticosterone                    | Cortisol- <i>d</i> <sub>4</sub>                      | 0.997                                       | 0.484 - 1.71            |
| Corticosterone - SRM 1945         | Cortisol- <i>d</i> <sub>4</sub>                      | 1.00                                        | 0.881 - 21.2            |
| Cortisol                          | Cortisol- <i>d</i> <sub>4</sub>                      | 0.994                                       | 0.924 - 4.32            |
| Cortisol - SRM 1945               | Cortisol- <i>d</i> <sub>4</sub>                      | 1.00                                        | 2.10 - 23.7             |
| Cortisone                         | Cortisol- <i>d</i> <sub>4</sub>                      | 0.974                                       | 0.217 - 1.94            |
| Cortisone - SRM 1945              | Cortisol- <i>d</i> <sub>4</sub>                      | 1.00                                        | 0.913 - 21.9            |
| Progesterone high                 | Progesterone- <sup>13</sup> C <sub>3</sub>           | 1.00                                        | 58.5 - 134              |
| Progesterone low                  | Progesterone- <sup>13</sup> C <sub>3</sub>           | 0.999                                       | 0.126 - 58.5            |
| Progesterone- SRM 1945            | Progesterone- <sup>13</sup> C <sub>3</sub>           | 1.00                                        | 7.44 - 361              |
| Testosterone                      | Testosterone- <sup>13</sup> C <sub>3</sub>           | 1.00                                        | 0.629 - 28.2            |
